# Supplementary material for: Transient absorption, femtosecond dynamics, vibrational coherence and molecular modelling of the photoisomerization of N-salicylidene-o-aminophenol in solution
Source: Royal Society of Chemistry journal article supplement (doi:10.1039/d1cp02339j), 2021-01-01
Supplement: d1cp02339j1.pdf [file d1cp02339j1.pdf]

**Transient absorption, femtosecond dynamics, vibrational coherence and  
molecular modelling of the photoisomerization of  
N-salicylidene-o-aminophenol in solution**

Nikolai Petkov<sup>1</sup>, Anela Ivanova<sup>1</sup>, Anton A. Trifonov<sup>2</sup>, Ivan C. Buchvarov<sup>2, 3</sup>, Stanislav S. Stanimirov<sup>1, 2, \*</sup>

**(Electronic Supplementary Information)**

---

<sup>1</sup> Faculty of Chemistry and Pharmacy, Sofia University, 1 J. Bourchier Blvd. 1164 Sofia, Bulgaria

<sup>2</sup> John Atanasoff Center for Bio and Nano Photonics (JAC BNP), 1164 Sofia, Bulgaria

<sup>3</sup> Faculty of Physics, Sofia University, 5 J. Bourchier Blvd. 1164 Sofia, Bulgaria

\*Corresponding author: E-mail: [sstanimirov@chem.uni-sofia.bg](mailto:sstanimirov@chem.uni-sofia.bg) Tel.: +35928161451

**Table S1:** Relative energy ( $\Delta E$ ) of the ground state of each conformer of the keto-tautomer calculated with respect to the lowest value, the respective Boltzmann weight and the corresponding absorption transition energy (E)

| Transition $S_0 \rightarrow S_1$ |                       |                  |              |
|----------------------------------|-----------------------|------------------|--------------|
| Conformer                        | $\Delta E$ , kcal/mol | Boltzmann weight | E, eV        |
| 1                                | 1.373                 | 0.074            | 2.773        |
| 2 <sup>#</sup>                   | 0.000                 | 0.748            | 2.708        |
| 3                                | 0.855                 | 0.177            | 2.752        |
| 4                                | 3.626                 | 0.002            | 2.855        |
|                                  |                       | Averaged E, eV   | <b>2.721</b> |
| Transition $S_0 \rightarrow S_2$ |                       |                  |              |
| 1                                | 1.373                 | 0.074            | 2.854        |
| 2                                | 0.000                 | 0.748            | 2.673        |
| 3                                | 0.855                 | 0.177            | 2.761        |
| 4                                | 3.626                 | 0.002            | 2.722        |
|                                  |                       | Averaged E, eV   | <b>2.702</b> |
| Transition $S_0 \rightarrow S_3$ |                       |                  |              |
| 1                                | 1.373                 | 0.074            | 3.104        |
| 2                                | 0.000                 | 0.748            | 3.113        |
| 3                                | 0.855                 | 0.177            | 3.238        |
| 4                                | 3.626                 | 0.002            | 3.106        |
|                                  |                       | Averaged E, eV   | <b>3.135</b> |

<sup>#</sup>Ground state energy of conformer 2: -707.058700 a. u.

**Table S2:** Relative energy ( $\Delta E$ ) of the excited state of each conformer of the keto-tautomer calculated with respect to the lowest value, the respective Boltzmann weight and the corresponding emission transition energy (E)

| Transition $S_1 \rightarrow S_0$ |                       |                  |              |
|----------------------------------|-----------------------|------------------|--------------|
| Conformer                        | $\Delta E$ , kcal/mol | Boltzmann weight | E, eV        |
| 1                                | 3.008                 | 0.006            | 2.336        |
| 2 <sup>#</sup>                   | 0.000                 | 0.983            | 2.346        |
| 3                                | 2.690                 | 0.011            | 2.387        |
| 4                                | 5.212                 | 0                | 2.325        |
|                                  |                       | Averaged E, eV   | <b>2.346</b> |
| Transition $S_2 \rightarrow S_0$ |                       |                  |              |
| 1                                | 0.002                 | 0.497            | 2.411        |
| 2 <sup>#</sup>                   | 0.000                 | 0.499            | 2.411        |
| 3                                | 2.889                 | 0.004            | 2.464        |
| 4                                | 4.909                 | 0                | 20450        |
|                                  |                       | Averaged E, eV   | <b>2.411</b> |

<sup>#</sup>Excited state energy of conformer 2: ( $S_1$ ) -706.965941 a. u.; ( $S_2$ ) -706.950928 a. u.

**Table S3:** Relative energy ( $\Delta E$ ) of the ground state of each conformer of the enol-tautomer calculated with respect to the lowest value, the respective Boltzmann weight and the corresponding absorption transition energy (E)

| Transition $S_0 \rightarrow S_1$ |                       |                  |              |
|----------------------------------|-----------------------|------------------|--------------|
| Conformer                        | $\Delta E$ , kcal/mol | Boltzmann weight | E, eV        |
| 1                                | 4.764                 | 0.000            | 2.888        |
| 2                                | 6.911                 | 0.000            | 2.867        |
| 3 <sup>#</sup>                   | 0.000                 | 0.859            | 2.893        |
| 4                                | 3.448                 | 0.003            | 2.863        |
| 5                                | 1.289                 | 0.097            | 3.030        |
| 6                                | 6.288                 | 0.000            | 2.980        |
| 7                                | 1.800                 | 0.041            | 3.141        |
|                                  |                       | Averaged E, eV   | <b>2.916</b> |
| Transition $S_0 \rightarrow S_2$ |                       |                  |              |
| 1                                | 4.764                 | 0.000            | 3.334        |
| 2                                | 6.911                 | 0.000            | 3.291        |
| 3                                | 0.000                 | 0.859            | 3.299        |
| 4                                | 3.448                 | 0.003            | 3.350        |
| 5                                | 1.289                 | 0.097            | 3.295        |
| 6                                | 6.288                 | 0.000            | 3.411        |
| 7                                | 1.800                 | 0.041            | 3.365        |
|                                  |                       | Averaged E, eV   | <b>3.302</b> |
| Transition $S_0 \rightarrow S_3$ |                       |                  |              |
| 1                                | 4.764                 | 0.000            | 3.625        |
| 2                                | 6.911                 | 0.000            | 3.600        |
| 3                                | 0.000                 | 0.859            | 3.625        |
| 4                                | 3.448                 | 0.003            | 3.541        |
| 5                                | 1.289                 | 0.097            | 3.693        |
| 6                                | 6.288                 | 0.000            | 3.597        |
| 7                                | 1.800                 | 0.041            | 3.720        |
|                                  |                       | Averaged E, eV   | <b>3.635</b> |

<sup>#</sup>Ground state energy of conformer 3: -707.063924 a. u.

**Table S4:** Relative energy ( $\Delta E$ ) of the excited state of each conformer of the enol-tautomer calculated with respect to the lowest value, the respective Boltzmann weight and the corresponding emission transition energy (E)

| Transition $S_1 \rightarrow S_0$ |                       |                  |              |
|----------------------------------|-----------------------|------------------|--------------|
| Conformer                        | $\Delta E$ , kcal/mol | Boltzmann weight | E, eV        |
| 7 <sup>#</sup>                   | 0.000                 | 1                | 0.079        |
|                                  |                       | 'Averaged' E, eV | <b>0.079</b> |
| Transition $S_2 \rightarrow S_0$ |                       |                  |              |
| 1                                | 7.041                 | 0.000            | 3.019        |
| 3 <sup>#</sup>                   | 0.000                 | 0.911            | 2.873        |
| 5                                | 1.374                 | 0.090            | 2.861        |
| 6                                | 9.888                 | 0.000            | 3.118        |
|                                  |                       | Averaged E, eV   | <b>2.872</b> |

<sup>#</sup>  $S_1$  energy of conformer 7: -706.969153 a. u.;  $S_2$  energy of conformer 3: -706.937523 a. u.
