# Supplementary material for: Transient absorption, femtosecond dynamics, vibrational coherence and molecular modelling of the photoisomerization of N-salicylidene-o-aminophenol in solution
Source: Royal Society of Chemistry journal article supplement (doi:10.1039/d1cp02339j), 2021-01-01
Supplement: d1cp02339j2.pdf [file d1cp02339j2.pdf]

## Calculated vibrations in the Z-keto form ground state

### Lowest-energy conformer

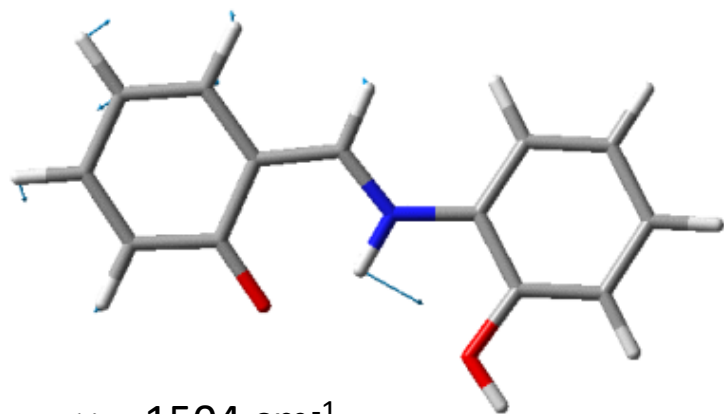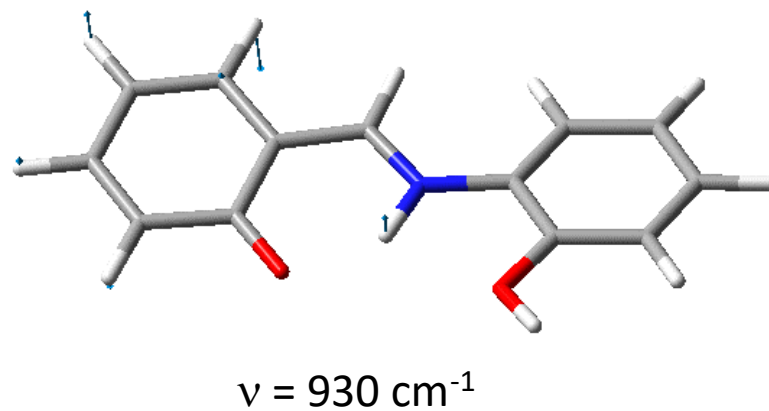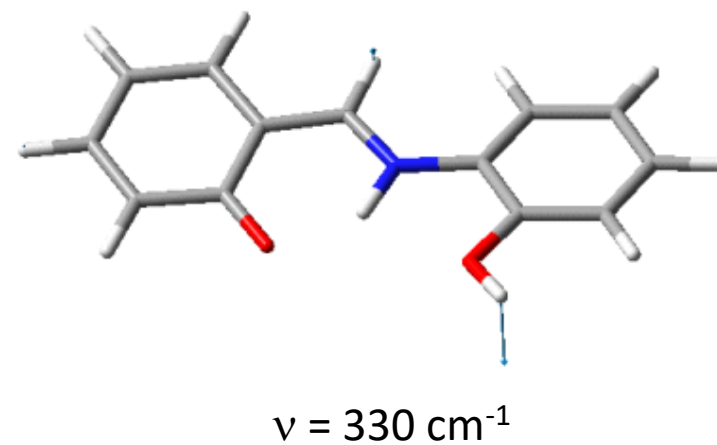

### Higher-energy conformer

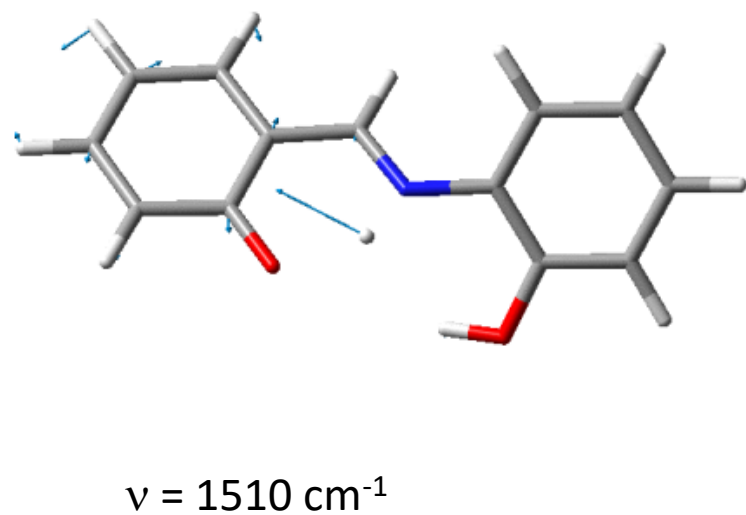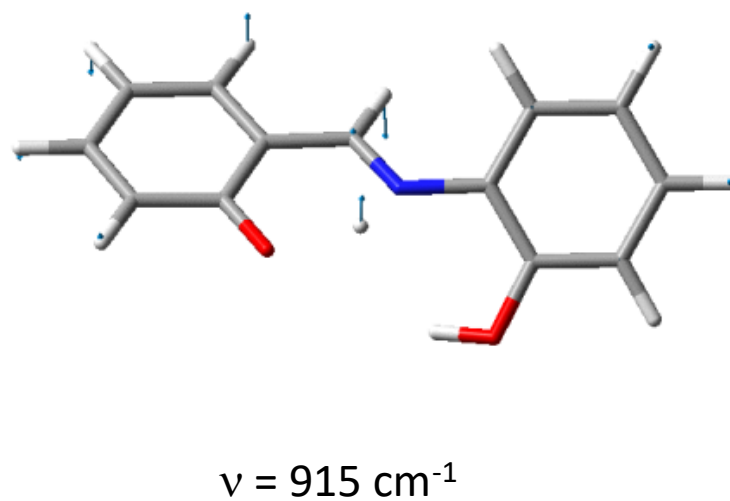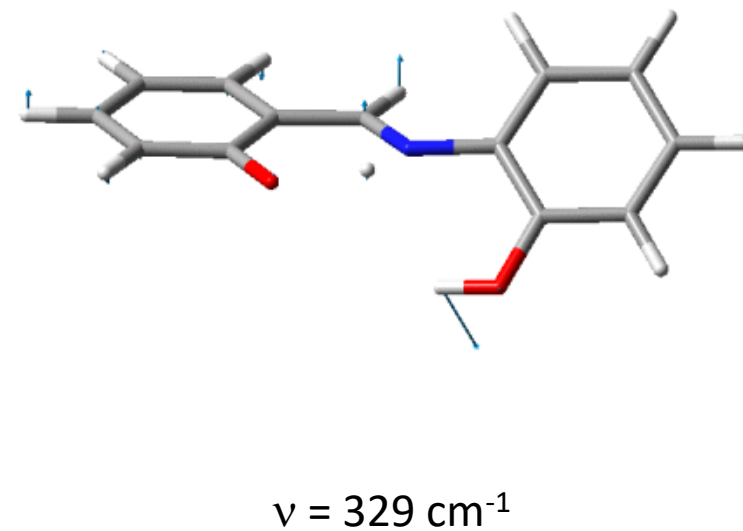

## Calculated vibrations in the Z-keto form excited state

### Lowest-energy conformer

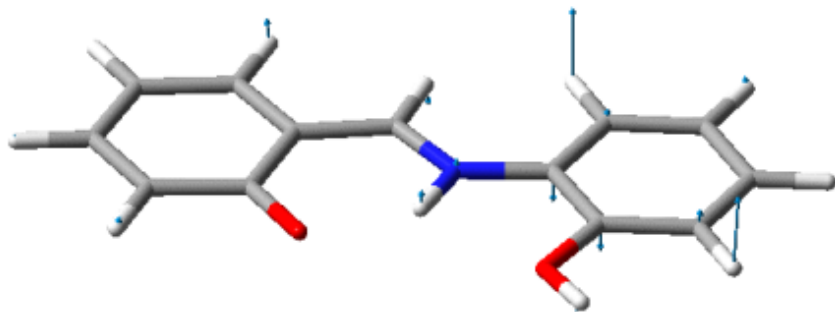

$\nu = 447 \text{ cm}^{-1}$

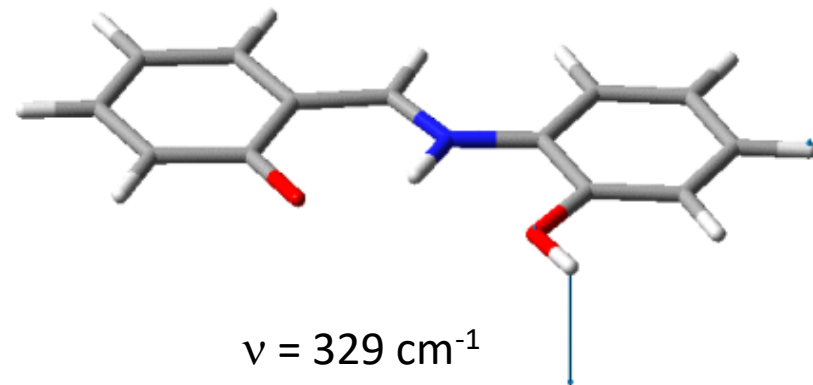

$\nu = 329 \text{ cm}^{-1}$

### Higher-energy conformer

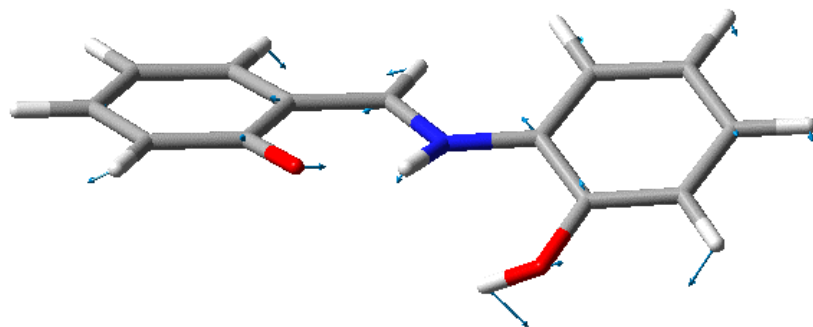

$\nu = 445 \text{ cm}^{-1}$

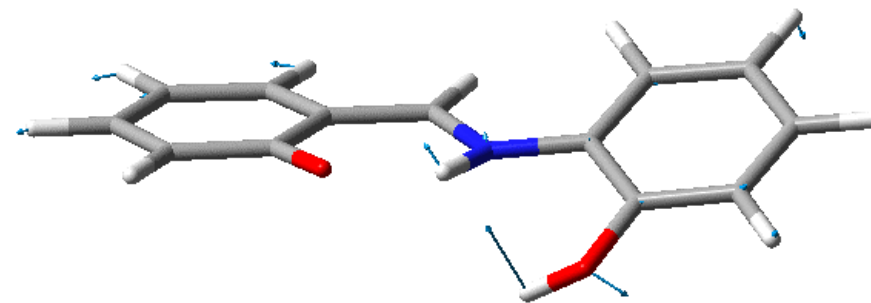

$\nu = 219 \text{ cm}^{-1}$
